# Supplementary material for: Ultralayered core–shell metal oxide nanosheet arrays for supercapacitors with long-term electrochemical stability
Source: Royal Society of Chemistry journal article supplement (doi:10.1039/c8se00290h), 2018-01-01
Supplement: c8se00290h1.pdf [file c8se00290h1.pdf]

Supporting Information for

**Ultralayered Core-shell Metal Oxide Nanosheet Arrays for  
Supercapacitors With Long-term Electrochemical Stability**

Dandan Han <sup>a, b, \*</sup>, Ye Shen <sup>a</sup>, Yifan Pan <sup>a</sup>, Zhenyu Cheng <sup>a</sup>, Yen Wei <sup>b\*</sup>, Guangjian Zeng <sup>c</sup>, Liucheng Mao <sup>c</sup>

*<sup>a</sup> College of Chemistry and Pharmaceutical Engineering, Jilin Institute of Chemical Technology, Jilin 132022, China*

*<sup>b</sup> Department of Chemistry and the Tsinghua Center for Frontier Polymer Research, Tsinghua University, Beijing, 100084, China*

*<sup>c</sup> Department of Chemistry, Nanchang University, 999 Xuefu Avenue, Nanchang 330031, China*

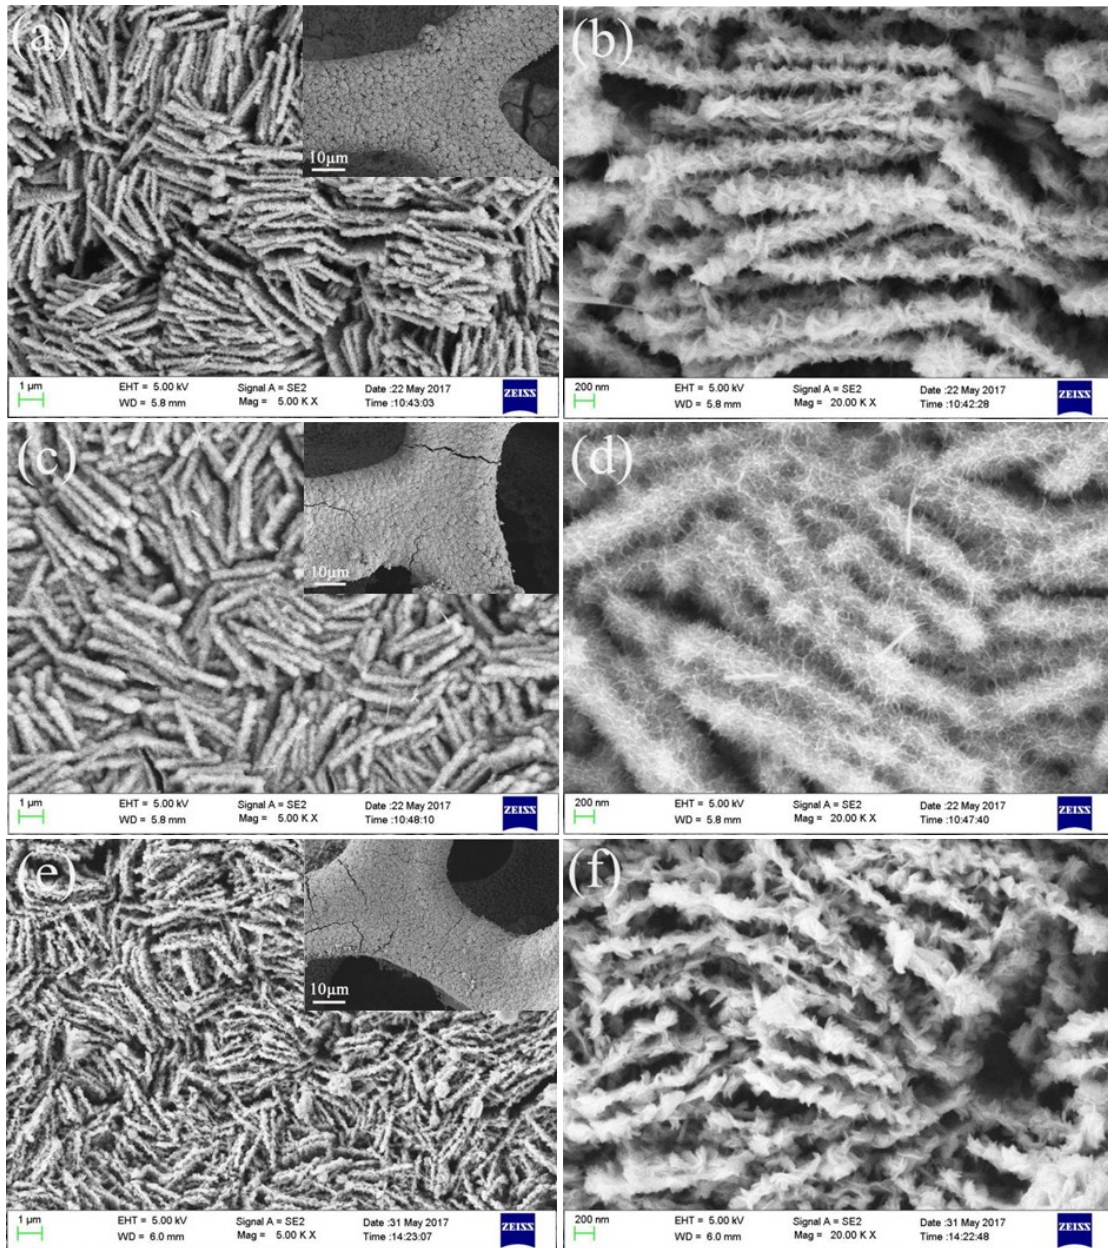

Figure S1.  $\text{Co}_3\text{O}_4$  nanowire@NiO nanosheet core-shell arrays with different electrodeposition time. (a, b) 15min. (c, d) 30min. (e, f) 105min.

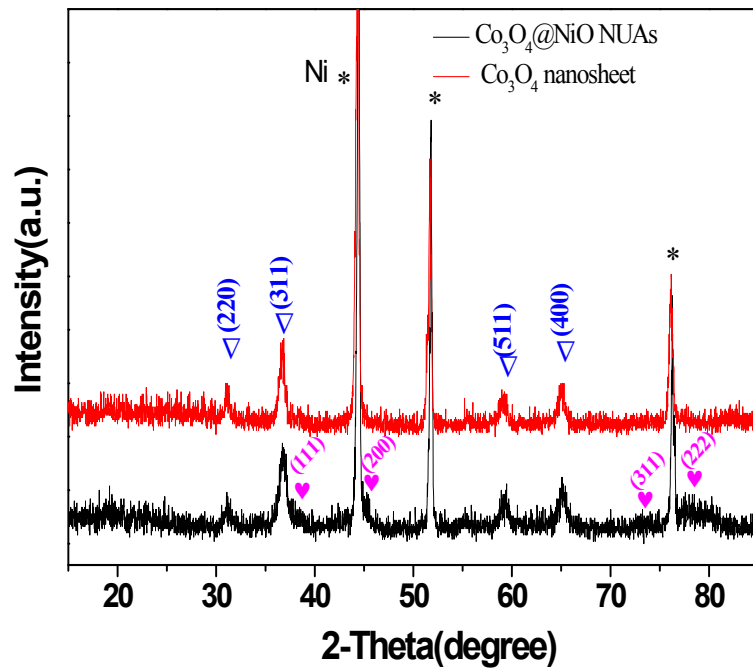

Figure S2. XRD patterns for  $\text{Co}_3\text{O}_4@NiO$  UNAs and  $\text{Co}_3\text{O}_4$  nanosheet

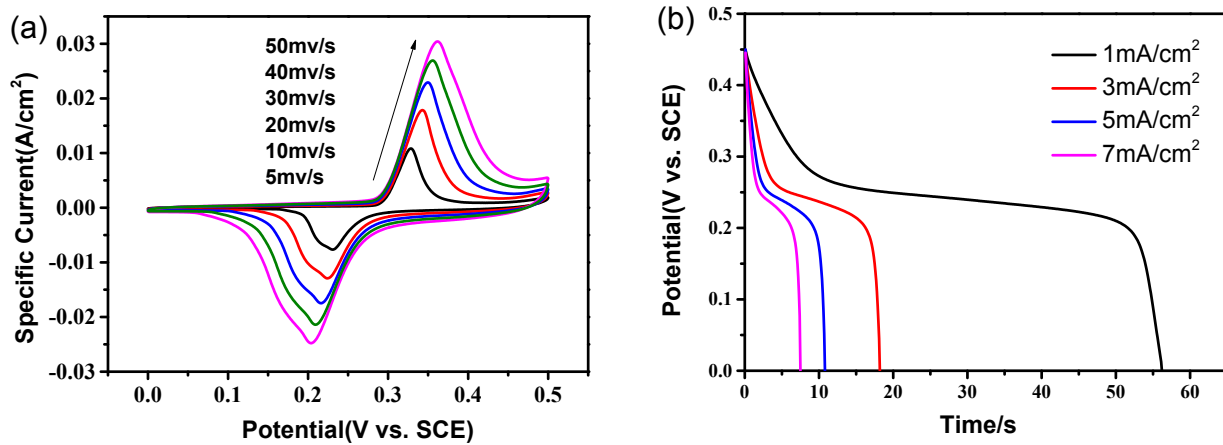

Figure S3. (a) CV curves with different scan rates and (b) galvanostatic charge-discharge curves at various of current density for Ni foam.

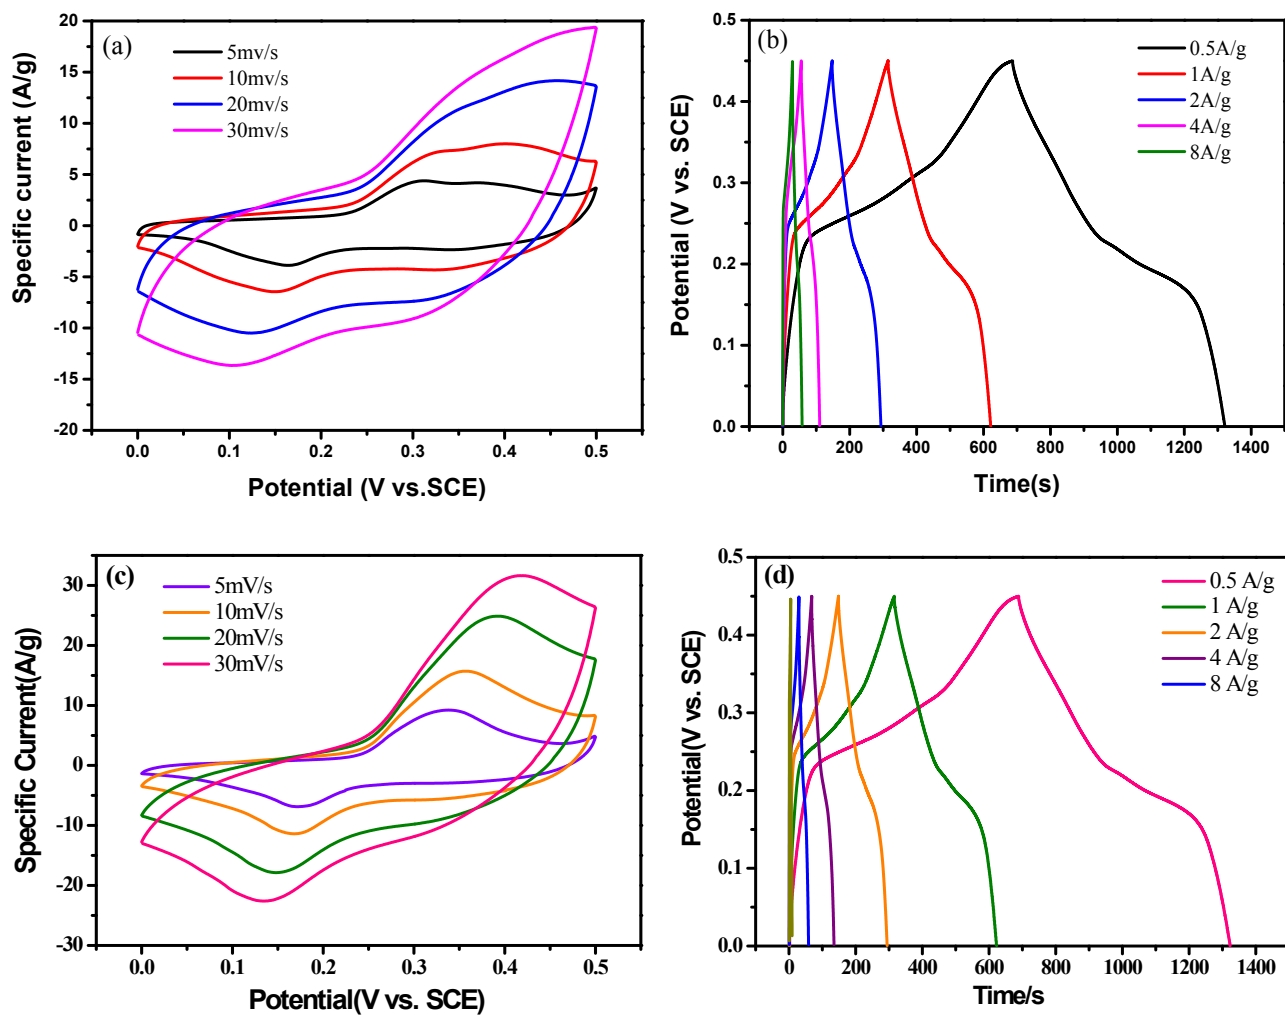

Figure S4. (a, c) CV curves at different scan rates for  $\text{Co}_3\text{O}_4@\text{NiO}$  UNAs and  $\text{Co}_3\text{O}_4$  nanosheet, and (b, d) galvanostatic charge-discharge curves at various of current density for  $\text{Co}_3\text{O}_4@\text{NiO}$  UNAs and  $\text{Co}_3\text{O}_4$  nanosheet, respectively.

Table S5. Compared cycle lifetime for different core-shell structured composites.

| Number | Electrode structure                                                                          | Current density        | Cycling stability        | Reference |
|--------|----------------------------------------------------------------------------------------------|------------------------|--------------------------|-----------|
| 1      | Co <sub>3</sub> O <sub>4</sub> @NiO//AC<br>ultralayered core/shell<br>nanosheet arrays       | 30 mA·cm <sup>-2</sup> | 6000 cycles<br>(102%)    | This work |
| 2      | CoMoO <sub>4</sub> @MnO <sub>2</sub> core-shell<br>nanosheet                                 | 20 mA·cm <sup>-2</sup> | 3000 cycles<br>(93%)     | [3]       |
| 3      | NiCo <sub>2</sub> O <sub>4</sub> @Co(OH) <sub>2</sub> //AC<br>nanotube                       | 1 A·g <sup>-1</sup>    | 5000 cycles<br>(70.10%)  | [12]      |
| 4      | CoO@MnO <sub>2</sub> //AC<br>nanosheet@nanosheet<br>arrays                                   | 20 mA·cm <sup>-2</sup> | 10000 cycles<br>(95.40%) | [13]      |
| 5      | Co <sub>3</sub> O <sub>4</sub> @NiO hierarchical<br>nanowire arrays                          | 1 A·g <sup>-1</sup>    | 2000 cycles<br>(98.8%)   | [18]      |
| 6      | NiCo <sub>2</sub> S <sub>4</sub> @Ni(OH) <sub>2</sub> //AC<br>Core-Shell Nanosheet<br>Arrays | 20 mA·cm <sup>-2</sup> | 2000 cycles<br>(98.8%)   | [26]      |
| 7      | Co <sub>9</sub> S <sub>8</sub> nanorod@Ni(OH) <sub>2</sub><br>nanosheet                      | 4 A·g <sup>-1</sup>    | 2000 cycles<br>(104.5%)  | [27]      |
| 8      | Co <sub>3</sub> O <sub>4</sub> @Co-Ni//AC<br>sulfides core/shell nanowire                    | 60 mA·cm <sup>-2</sup> | 4000 cycles<br>(91%)     | [41]      |
| 9      | NiCo <sub>2</sub> O <sub>4</sub> @Co <sub>3</sub> O <sub>4</sub> //AC                        | 2 A·g <sup>-1</sup>    | 7000 cycles<br>(97%)     | [42]      |
| 10     | NiO@MnOOH//AC                                                                                | 4 A·g <sup>-1</sup>    | 5000 cycles<br>(105.7%)  | [43]      |
| 11     | a-Fe <sub>2</sub> O <sub>3</sub> @MnO <sub>2</sub> core-shell<br>nanotubes                   | 1 A·g <sup>-1</sup>    | 1200 cycles<br>(85.3%)   | [44]      |
